# Supplementary material for: A self-assembled dual-phase composite as a precursor of high-performance anodes for intermediate temperature solid oxide fuel cells
Source: Royal Society of Chemistry journal article supplement (doi:10.1039/c8cc06911e), 2018-01-01
Supplement: c8cc06911e1.pdf [file c8cc06911e1.pdf]

Electronic Supplementary Material (ESI) for Chemical Communications.  
**This journal is © The Royal Society of Chemistry 2018**

## **Supplementary Information for:**

**A self-assembled dual-phase composite as precursor of high-performance anode for Intermediate temperature solid oxide fuel cells**

*Yefeng Song, Yi-Mei Yin\*, Linsen Li, Zonghai Chen, Zi-Feng Ma\**

## **Experimental Section**

### ***Sample preparation***

LS<sub>0.6</sub>FCN precursor was synthesized using a solid-state reaction method. The stoichiometric amounts of La<sub>2</sub>O<sub>3</sub>, SrCO<sub>3</sub>, Fe<sub>2</sub>O<sub>3</sub>, Cu<sub>2</sub>O and Nb<sub>2</sub>O<sub>5</sub> powders were mixed by ball milling for 24 h in a planetary ball miller, followed by uniaxially pressing the mixture at a pressure of 4 MPa into pellets. The pellets were calcined in air at 1000 °C for 10 h, subsequently grounded to obtain LS<sub>0.6</sub>FCN final powders.

Single cells with configuration of LS<sub>0.6</sub>FCN|SDC|ScSZ(200 μm)|SDC|LS<sub>0.6</sub>FCN were fabricated based on commercial ScSZ electrolyte pellets purchased from SOFCMAN Company (Ningbo, China). The SDC ink was screen-printed onto both sides of the electrolyte and sintered at 1250 °C for 2 h to form a protection interlayer with the thickness of ~ 10 μm. Then the LS<sub>0.6</sub>FCN ink was screen-printed on the surface of the SDC interlayer and sintered at 900 °C for 2 h. The thickness and active area of the electrodes are ~30 μm and ~ 0.28 cm<sup>2</sup>, respectively.

### ***Sample Characterizations***

The crystal structure of the powders before/after reduction are characterized by XRD measurements performed on an X-ray diffractometer (Rigaku D/max-2200/PC) with a Cu Ka radiation,  $\lambda = 0.15415$  nm. The XRD patterns in the 2 theta range of 10-100° are refined by

using the Rietveld method of the FullProf\_Suite program. The final agreement R-factors, the detailed Rietveld refinement parameters and crystal structure data of LS<sub>0.6</sub>FCN and R-LS<sub>0.6</sub>FCN are given in Table S1, Table S2 and Table S3.

The microstructures of the cross-section of porous LS<sub>0.6</sub>FCN pellets (pressed at 4 MPa and sintered at 900 °C for 10 h) before/after reduction were examined using SEM (Nova NanoSEM 450, FEI Company, USA) and HRTEM (JEM-2100, JEOL Ltd, Japan).

The I-V(P) curves of single cells were tested by four-probe configuration. The anode side is fed by fuels at the flow rate of 60 mL min<sup>-1</sup>, while the cathode is exposed to static air as oxidant. The cell was heated to 800 °C and held for 2 h in fuels to ensure a stable output. EIS of the cells were collected via AC impedance method using electrochemical workstation (Autolab PGSTAT 302 N, USA) in temperature range of 600-800 °C. An AC signal with 10 mV amplitude and a frequency range from 10<sup>-2</sup> Hz to 10<sup>6</sup> Hz was applied as stimuli. The cells were stabilized at each testing temperature for 15 min before the EIS spectra were collected.

## Supplementary Figures, tables and captions

**Table S1(a) and (b)** Details of Rietveld Refinement Results of LS<sub>0.6</sub>FCN and R-LS<sub>0.6</sub>FCN, respectively.

| <b>(a) LS<sub>0.6</sub>FCN</b>   |                            |                          |                                                            |                 |
|----------------------------------|----------------------------|--------------------------|------------------------------------------------------------|-----------------|
| Phase No.                        | SrLaFeO <sub>4</sub> -type |                          | Sr <sub>0.4</sub> La <sub>0.6</sub> FeO <sub>3</sub> -type |                 |
| Space Group                      | I 4/m mm                   |                          | R -3 c                                                     |                 |
| Cell parameters                  | a(Å)                       | 3.86674(118)             | a(Å)                                                       | 5.50040(52)     |
|                                  | b(Å)                       | 3.86674(118)             | b(Å)                                                       | 5.50040(52)     |
|                                  | c(Å)                       | 12.78770(544)            | c(Å)                                                       | 13.54159(198)   |
|                                  | α(°)                       | 90                       | α(°)                                                       | 90              |
|                                  | β(°)                       | 90                       | β(°)                                                       | 90              |
|                                  | γ(°)                       | 90                       | γ(°)                                                       | 120             |
|                                  | Volume(Å <sup>3</sup> )    | 191.192(116)             | Volume(Å <sup>3</sup> )                                    | 354.809(70)     |
|                                  | Fract(%)                   | 16.75(0.77)              |                                                            | 83.25(0.96)     |
| R-factors                        | Rwp                        |                          | 11.2%                                                      |                 |
|                                  | Rp                         |                          | 8.77%                                                      |                 |
|                                  | Rexp                       |                          | 9.64%                                                      |                 |
|                                  | χ <sup>2</sup>             |                          | 1.34                                                       |                 |
| <b>(b) R-LS<sub>0.6</sub>FCN</b> |                            |                          |                                                            |                 |
| Phase No.                        | SrLaFeO <sub>4</sub> -type | LaFeO <sub>3</sub> -type | Fe <sup>0</sup>                                            | Cu <sup>0</sup> |

|                 |                         |              |             |             |             |
|-----------------|-------------------------|--------------|-------------|-------------|-------------|
| Space Group     |                         | I 4/m mm     | P b n m     | I m -3 m    | F m -3 m    |
| Cell parameters | a(Å)                    | 3.88427(11)  | 5.57475(57) | 2.86447(29) | 3.61784(56) |
|                 | b(Å)                    | 3.88427(11)  | 5.57122(41) | 2.86447(29) | 3.61784(56) |
|                 | c(Å)                    | 12.71767(66) | 7.84557(76) | 2.86447(29) | 3.61784(56) |
|                 | $\alpha$ (°)            | 90.0         | 90.0        | 90.0        | 90.0        |
|                 | $\beta$ (°)             | 90.0         | 90.0        | 90.0        | 90.0        |
|                 | $\gamma$ (°)            | 90.0         | 90.0        | 90.0        | 90.0        |
|                 | Volume(Å <sup>3</sup> ) | 191.871(13)  | 243.669(34) | 23.503(4)   | 47.351(13)  |
| Fract(%)        |                         | 62.83(57)    | 27.44(36)   | 8.30(44)    | 1.43(15)    |
| R-factors       | Rwp                     |              |             | 12.1%       |             |
|                 | Rp                      |              |             | 9.25%       |             |
|                 | Rexp                    |              |             | 10.00%      |             |
|                 | $\chi^2$                |              |             | 1.47        |             |

**Table S2.** Atomic Coordinates and atom site occupancy for LS<sub>0.6</sub>FCN.

| <b>SrLaFeO<sub>4</sub>-type phase (SLF214)</b>                             |       |              |     |              |          |
|----------------------------------------------------------------------------|-------|--------------|-----|--------------|----------|
| atom                                                                       | Multi | x            | y   | z            | Occ.     |
| Sr1                                                                        | 4     | 0            | 0   | 0.35512(221) | 0.5      |
| La1                                                                        | 4     | 0            | 0   | 0.35512(221) | 0.5      |
| Fe1                                                                        | 2     | 0            | 0   | 0            | 0.801(3) |
| Cu1                                                                        | 2     | 0            | 0   | 0            | 0.141(2) |
| Nb1                                                                        | 2     | 0            | 0   | 0            | 0.054(3) |
| O1                                                                         | 4     | 0            | 0.5 | 0            | 1.0      |
| O2                                                                         | 4     | 0            | 0   | 0.16634(687) | 1.0      |
| <b>Sr<sub>0.4</sub>La<sub>0.6</sub>FeO<sub>3</sub>-type phase (SLF113)</b> |       |              |     |              |          |
| La1                                                                        | 6     | 0            | 0   | 0.25         | 0.713(2) |
| Sr1                                                                        | 6     | 0            | 0   | 0.25         | 0.287(2) |
| Fe1                                                                        | 6     | 0            | 0   | 0            | 0.832(3) |
| Cu1                                                                        | 6     | 0            | 0   | 0            | 0.182(4) |
| Nb1                                                                        | 6     | 0            | 0   | 0            | 0.007(5) |
| O1                                                                         | 18    | 0.19449(426) | 1/3 | 1/12         | 0.993(5) |

**Table S3.** Atomic Coordinates and atom site occupancy for R-LS<sub>0.6</sub>FCN.

| <b>SrLaFeO<sub>4</sub>-type phase (SLF214)</b> |       |              |              |              |          |
|------------------------------------------------|-------|--------------|--------------|--------------|----------|
| atom                                           | Multi | x            | y            | z            | Occ.     |
| Sr1                                            | 4     | 0            | 0            | 0.35742(21)  | 0.5      |
| La1                                            | 4     | 0            | 0            | 0.35742(21)  | 0.5      |
| Fe1                                            | 2     | 0            | 0            | 0            | 1.0      |
| O1                                             | 4     | 0            | 0.5          | 0            | 1.0      |
| O2                                             | 4     | 0            | 0            | 0.16865(138) | 1.0      |
| <b>LaFeO<sub>3</sub>-type phase (LFO113)</b>   |       |              |              |              |          |
| La1                                            | 4     | 0.98542(162) | 0.01653(163) | 0.25         | 1.0      |
| Fe1                                            | 4     | 0            | 0.5          | 0            | 1.11(5)  |
| O1                                             | 8     | 0.71910(231) | 0.30281(212) | 0.02910(311) | 1.06(7)  |
| O2                                             | 4     | 0.08996(175) | 0.39247(346) | 0.25         | 1.36(13) |
| <b>Fe<sup>0</sup> phase</b>                    |       |              |              |              |          |
| Fe1                                            | 2     | 0            | 0            | 0            | 1.0      |
| <b>Cu<sup>0</sup> phase</b>                    |       |              |              |              |          |
| Cu1                                            | 4     | 0            | 0            | 0            | 1.0      |

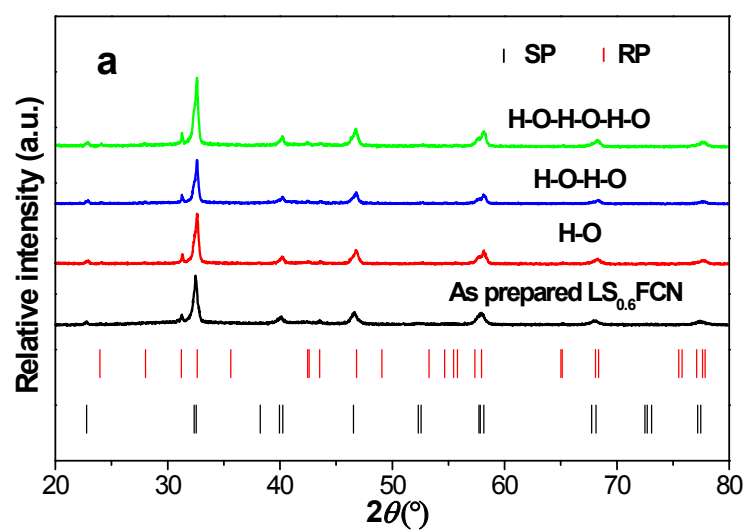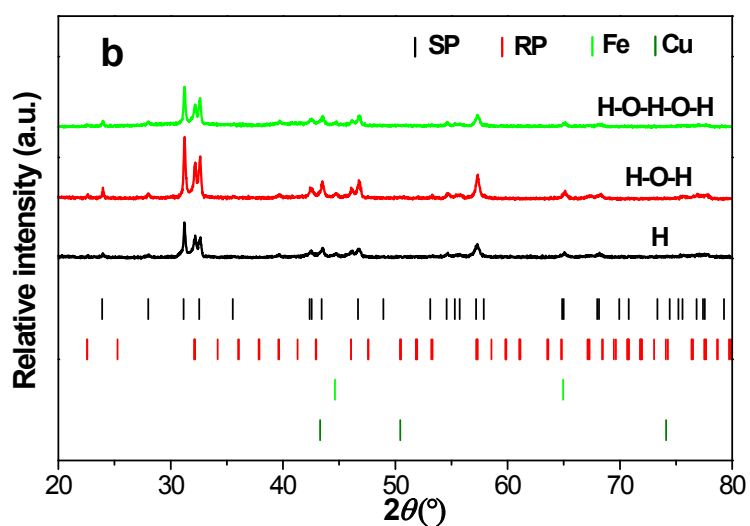

**Figure S1** XRD patterns of the as-prepared  $LS_{0.6}FCN$  powders in 3 redox cycles at 800 °C  
 (a) in air and (b) in humified  $H_2$  (3%), respectively, for 10 h.

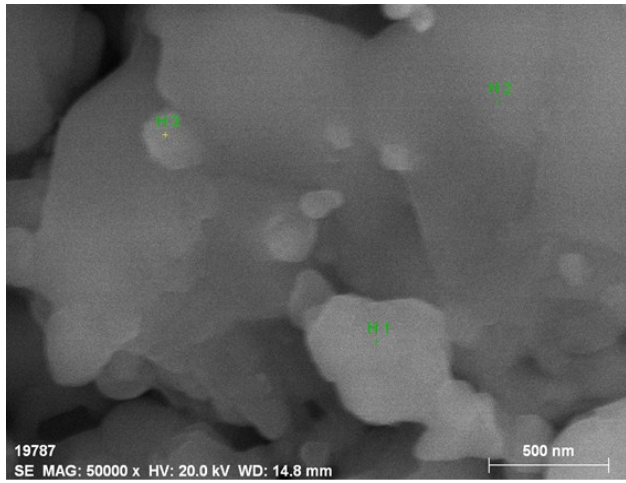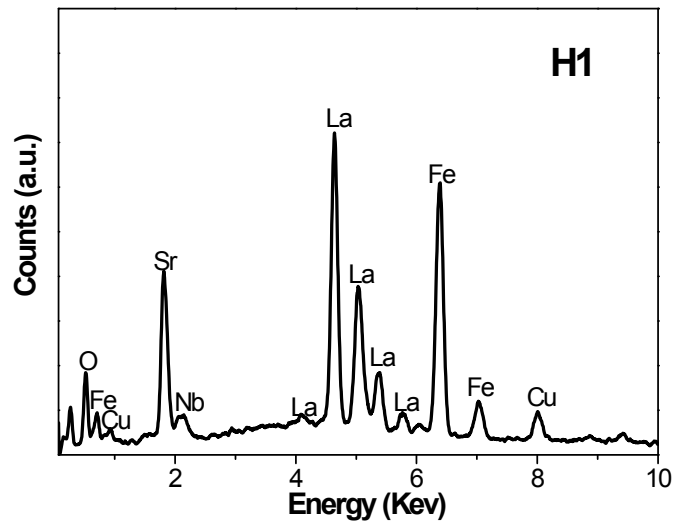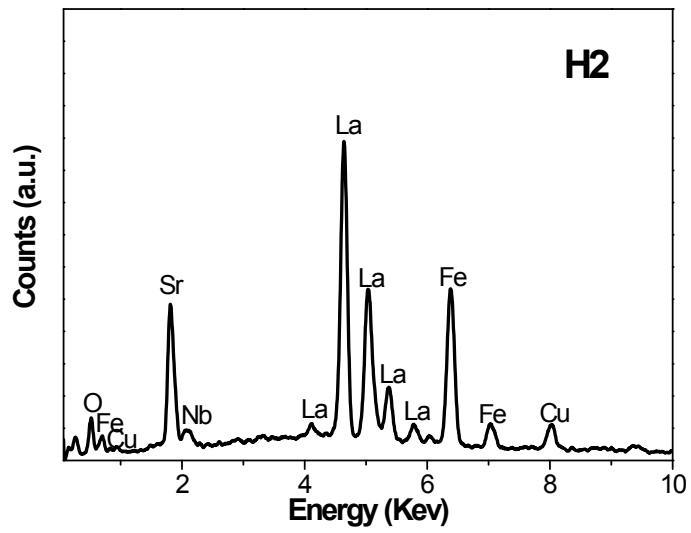

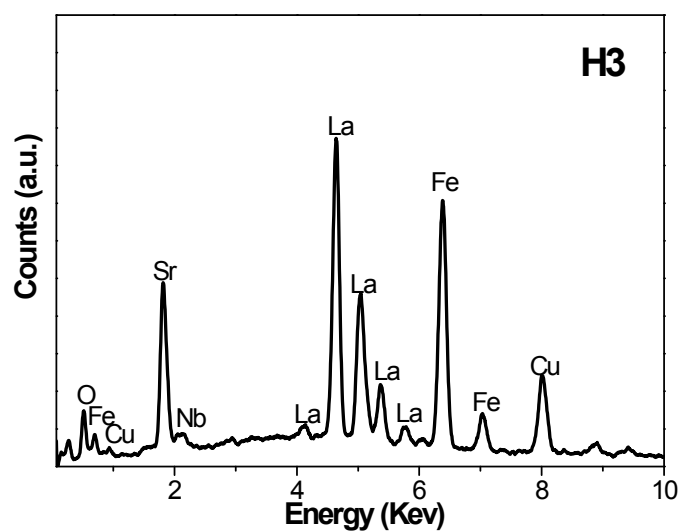

**Figure S2** EDS spectra of regions (H1, H2, H3) on the  $LS_{0.6}FCN$  pellet after reduction in humidified  $H_2$  (3%  $H_2O$ ) at 800 °C for 20 h.

**Table S4** The element distribution of the three regions in the  $LS_{0.6}FCN$  pellet after reduction in humidified  $H_2$  at 800 °C for 20 h identified by EDS of SEM

| Atomic con. | La   | Sr   | Fe          | Cu          | Nb   |
|-------------|------|------|-------------|-------------|------|
| <b>H1</b>   | 0.52 | 0.58 | <b>0.90</b> | 0.13        | 0.09 |
| <b>H2</b>   | 0.64 | 0.46 | 0.62        | 0.11        | 0.03 |
| <b>H3</b>   | 0.58 | 0.52 | <b>0.82</b> | <b>0.35</b> | 0.04 |

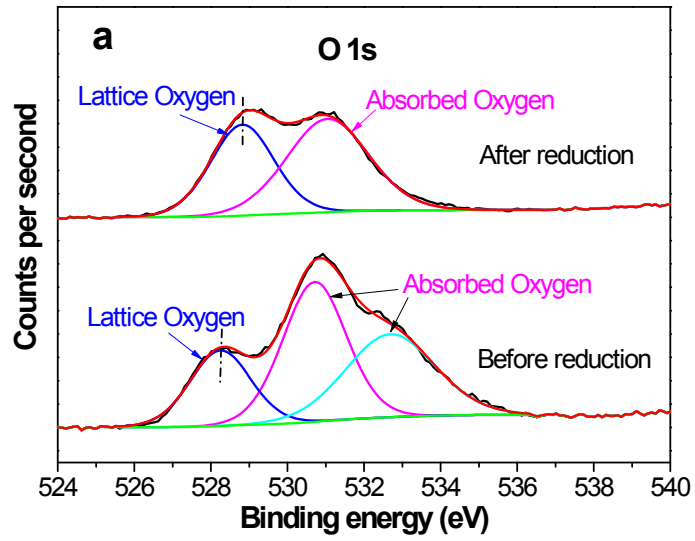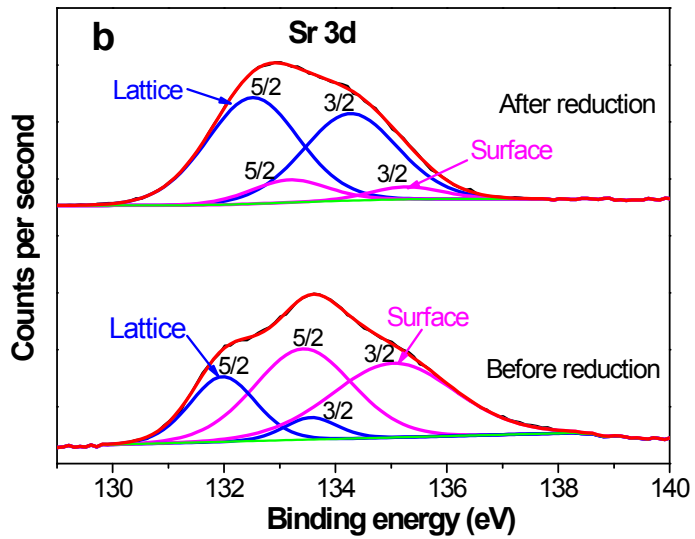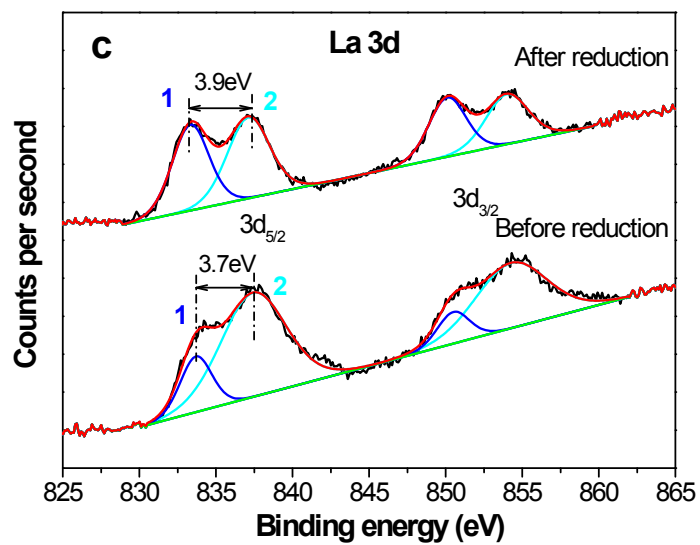



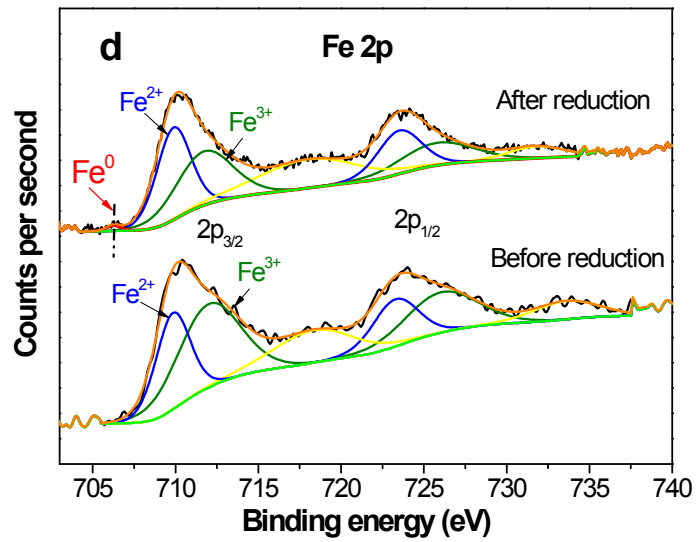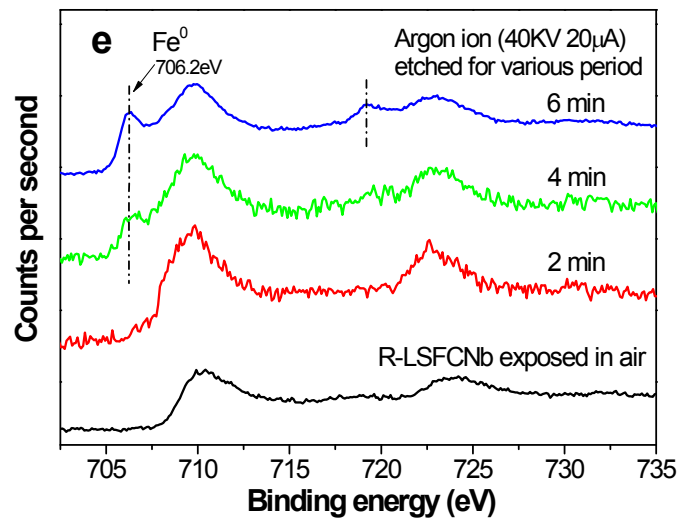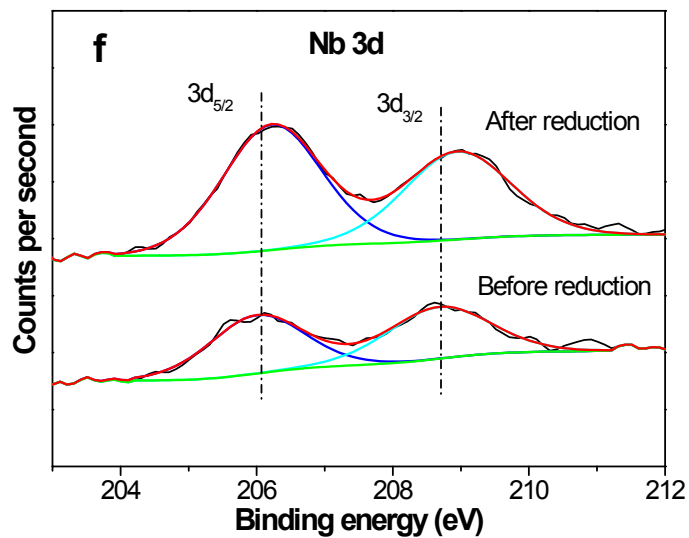

**Figure S3** XPS spectra of the  $LS_{0.6}FCN$  powders before and after reduction for (a) O1s, the relative intensity of lattice oxygen increases after reduction, suggesting that more RP phase formed at the surface of the reduced sample; (b) Sr 3d, the XPS spectra of Sr-3d demonstrate that the lattice Sr component (132-132.7eV) becomes much greater relative to the surface Sr component (133.4-134) after reduction, which is an indication of formation of RP phase at the surface of SP substrate on heating at low oxygen partial pressure as proved by a previous work.<sup>S1</sup> (c) La 3d, the binding energy difference of the splitted La 3d<sub>5/2</sub> peaks slightly increases, and the relative intensity of the peak at a higher binding energy position obviously decreases after reduction, which are indications of the transformation of La-CO<sub>3</sub> bond in air to La-OH bond in wet H<sub>2</sub> (<https://xpssimplified.com/elements/lanthanum.php>). (d) Fe 2p, a weak signal of Fe<sup>0</sup> can be observed at 706.2eV for the reduced sample possibly due to partial oxidation of metallic Fe at top surface in the transfer of the sample from lab oven to XPS instrument, and the relative intensity of Fe<sup>2+</sup> signal increases after reduction; (e) After 4-min Ar<sup>+</sup> ion etch on the reduced sample, a new peak clearly appeared at 706.2eV on the shoulder of the Fe (2p<sub>3/2</sub>) region, which corresponds to the presence of metallic Fe. (f) Nb 3d, the intensity of Nb3d 5/2 increases after reduction suggests that the Nb element may be enriched at surface in the environment with more lattice oxygen.

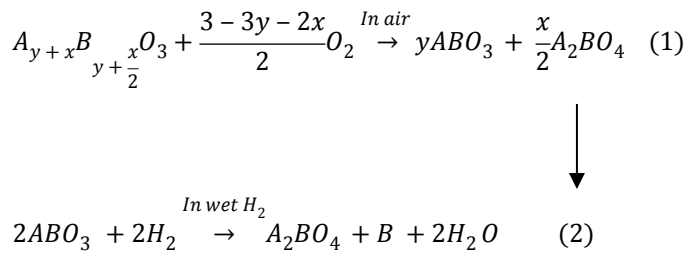

**Figure S4** A proposed self-assemble mechanisms in the form of chemical reactions in air and in wet H<sub>2</sub>

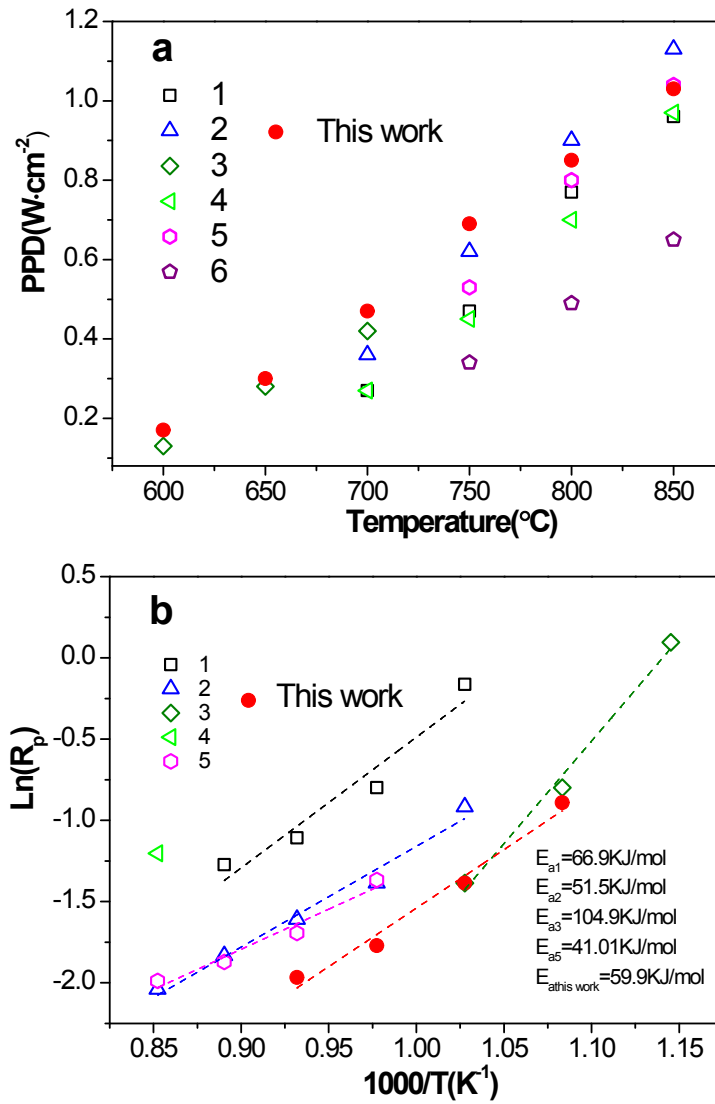

**Figure S5** Arrhenius plots of peak power density (PPD) and polarization resistance ( $R_p$ ) of ScSZ electrolyte supported full cell with R-LS<sub>0.6</sub>FCN anode compared with the cells with oxide composite anodes prepared from single perovskite precursors fed with H<sub>2</sub> fuel:

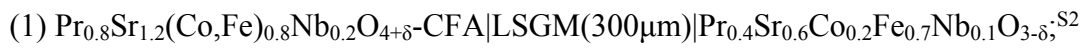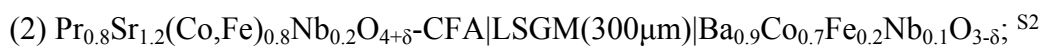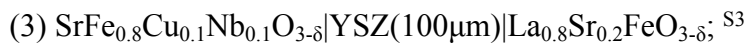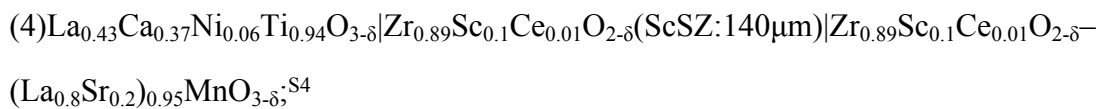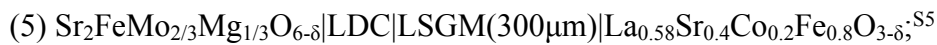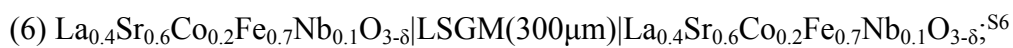

This work:  $\text{LS}_{0.6}\text{FCN}|\text{SDC}|\text{ScSZ}(200\mu\text{m})|\text{SDC}|\text{LS}_{0.6}\text{FCN}$

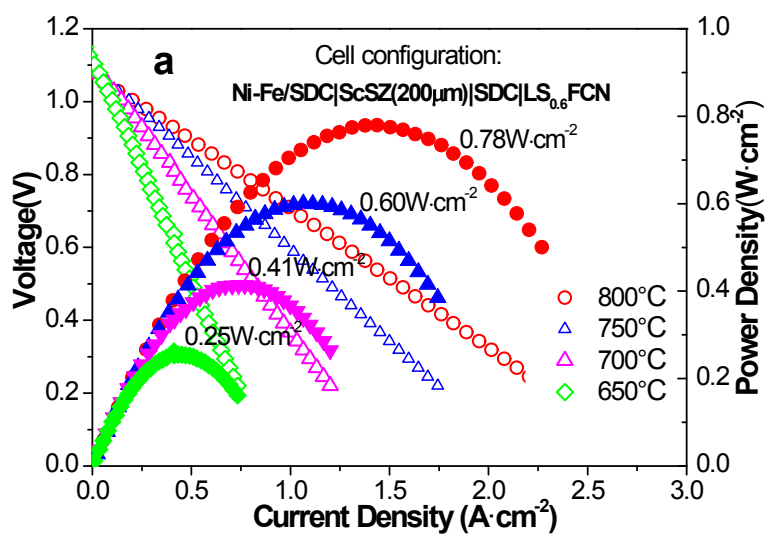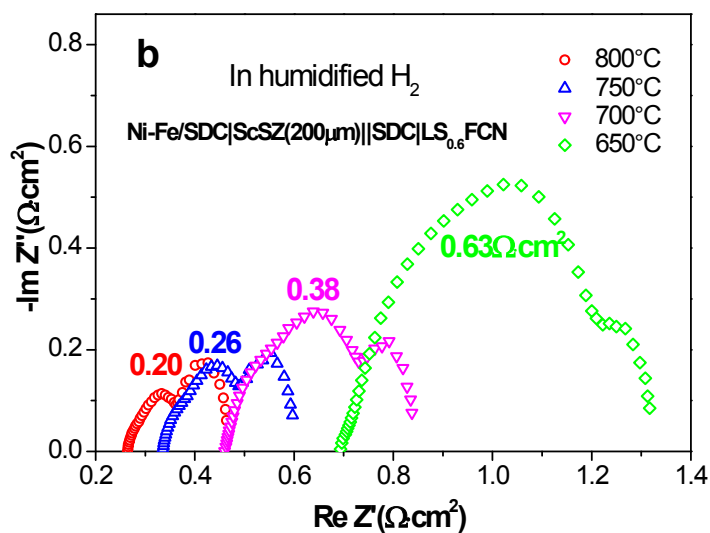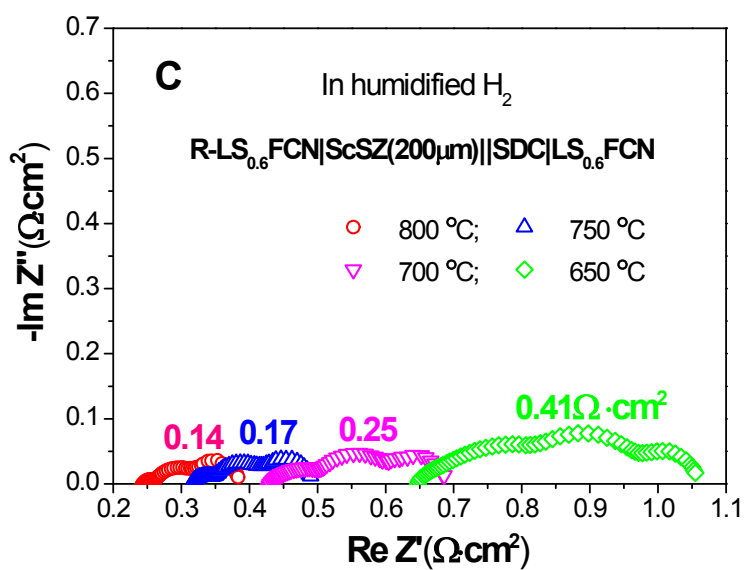

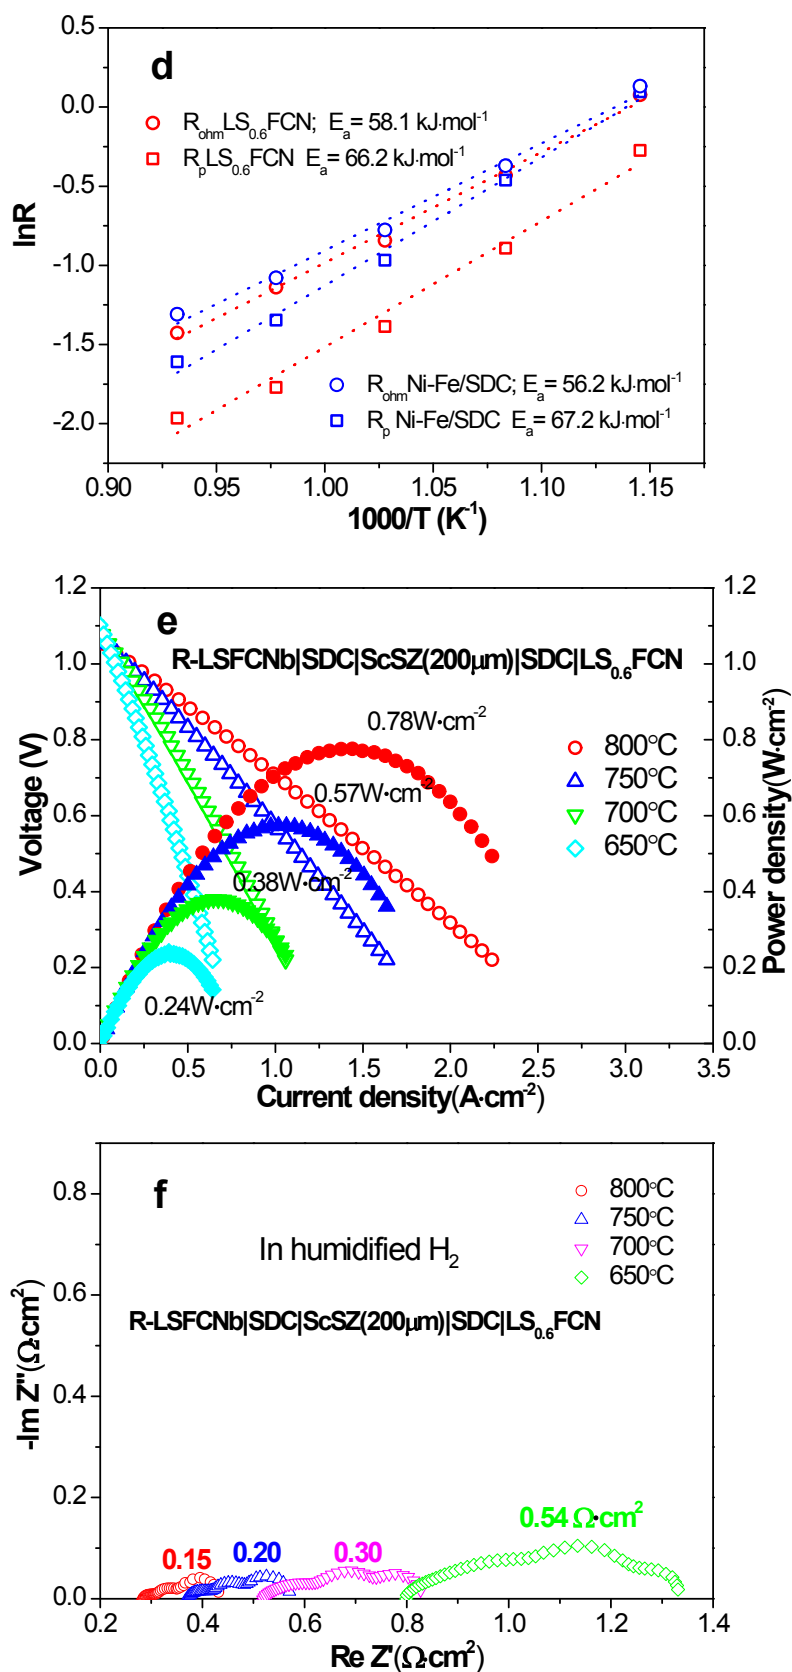

**Figure S6** (a) I-V(P) curves of the cells with Ni-Fe/SDC cermet anode measured at various temperatures with static air as oxidant and humidified H<sub>2</sub> (3% H<sub>2</sub>O) as fuel; (b) Corresponding EIS of the cell with Ni-Fe/SDC cermet anode at 650-800 °C; (c) EIS of the cell with R-

LS<sub>0.6</sub>FCN anode at 650-800 °C; (d) Arrhenius plots of R<sub>p</sub> and R<sub>ohm</sub> of the cells with R-LS<sub>0.6</sub>FCN and Ni-Fe/SDC cermet anodes, respectively. (e) I-V(P) curves of the cells with the R-LSFCNb anode in humidified H<sub>2</sub> at 650-800 °C; (f) Corresponding EIS of the R-LSFCNb cell at 650-800 °C.

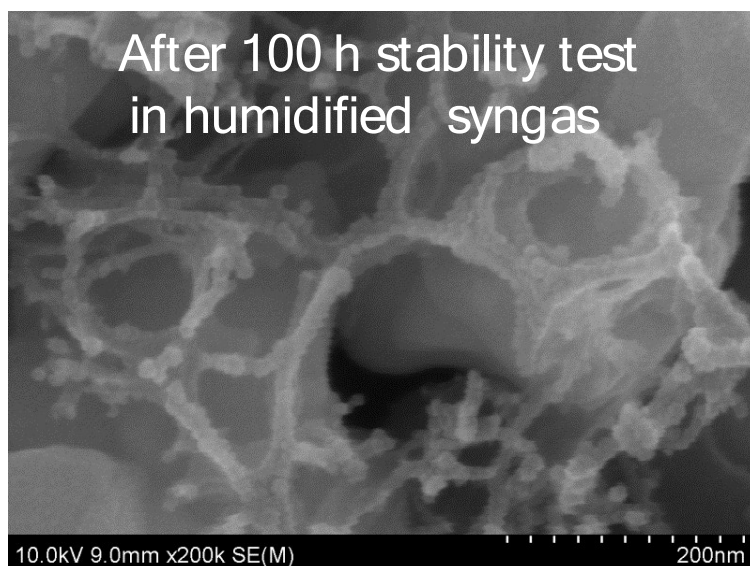

**Figure S7** Cross-sectional SEM image of the R-LS<sub>0.6</sub>FCN cell after 100 h operation at 700 °C under constant voltage of 0.7 V using syngas fuel.

#### Supplementary References

- S1. Z. Feng, E. J. Crumlin, W. T. Hong, D. Lee, E. Mutoro, M. D. Biegalski, H. Zhou, H. Bluhm, H. M. Christen and Y. Shao-Horn, *J. Phys. Chem. Lett.*, 2013, 4, 1512-1518.
- S2. C. Yang, Z. Yang, C. Jin, G. Xiao, F. Chen, M. Han, *Adv. Mater.* 2012, 24 (11), 1439-43.
- S3. R. Lan, P. I. Cowin, S. S., S. Tao, *Sci. Reports* 2016, 6, 31839.
- S4. J.-h. Myung, D. Neagu, D. N. Miller, J. T. S. Irvine, *Nature* 2016, 537 (7621), 528-531.
- S5. Z. Du, H. Zhao, S. Li, Y. Zhang, X. Chang, Q. Xia, N. Chen, L. Gu, K. Świerczek, Y. Li, T. Yang, K. An, *Adv. Energy Mater.* 2018, 1800062.
- S6. Z. Yang, Y. Chen, N. Xu, Y. Niu, M. Han, F. Chen, *J. Electrochem. Soc.* 2015, 162 (7), F718-F721.
